# Supplementary material for: Treatment planning for MR-guided SBRT of pancreatic tumors on a 1.5 T MR-Linac: A global consensus protocol
Source: PubMed Central journal article supplement (PMC11145226; doi:10.1016/j.ctro.2024.100797), 2024-05-18
Supplement: mmc1.pdf [file mmc1.pdf]

## Supplementary Materials

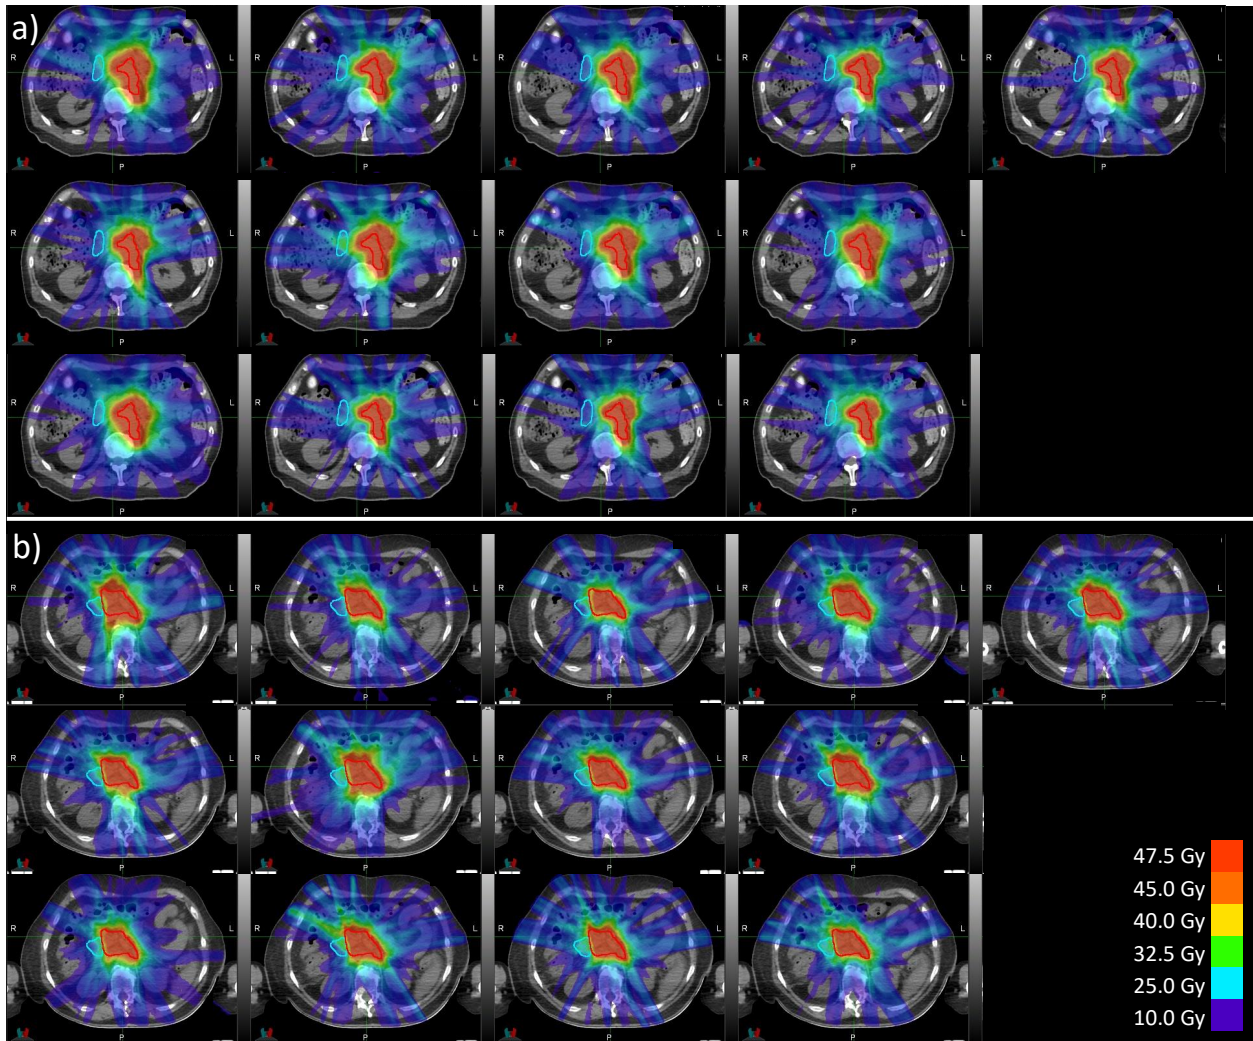

Figure S1: The dose distributions from all thirteen centers from phase II for a) case 1 and b) case 2. Red = GTV, cyan = duodenum.

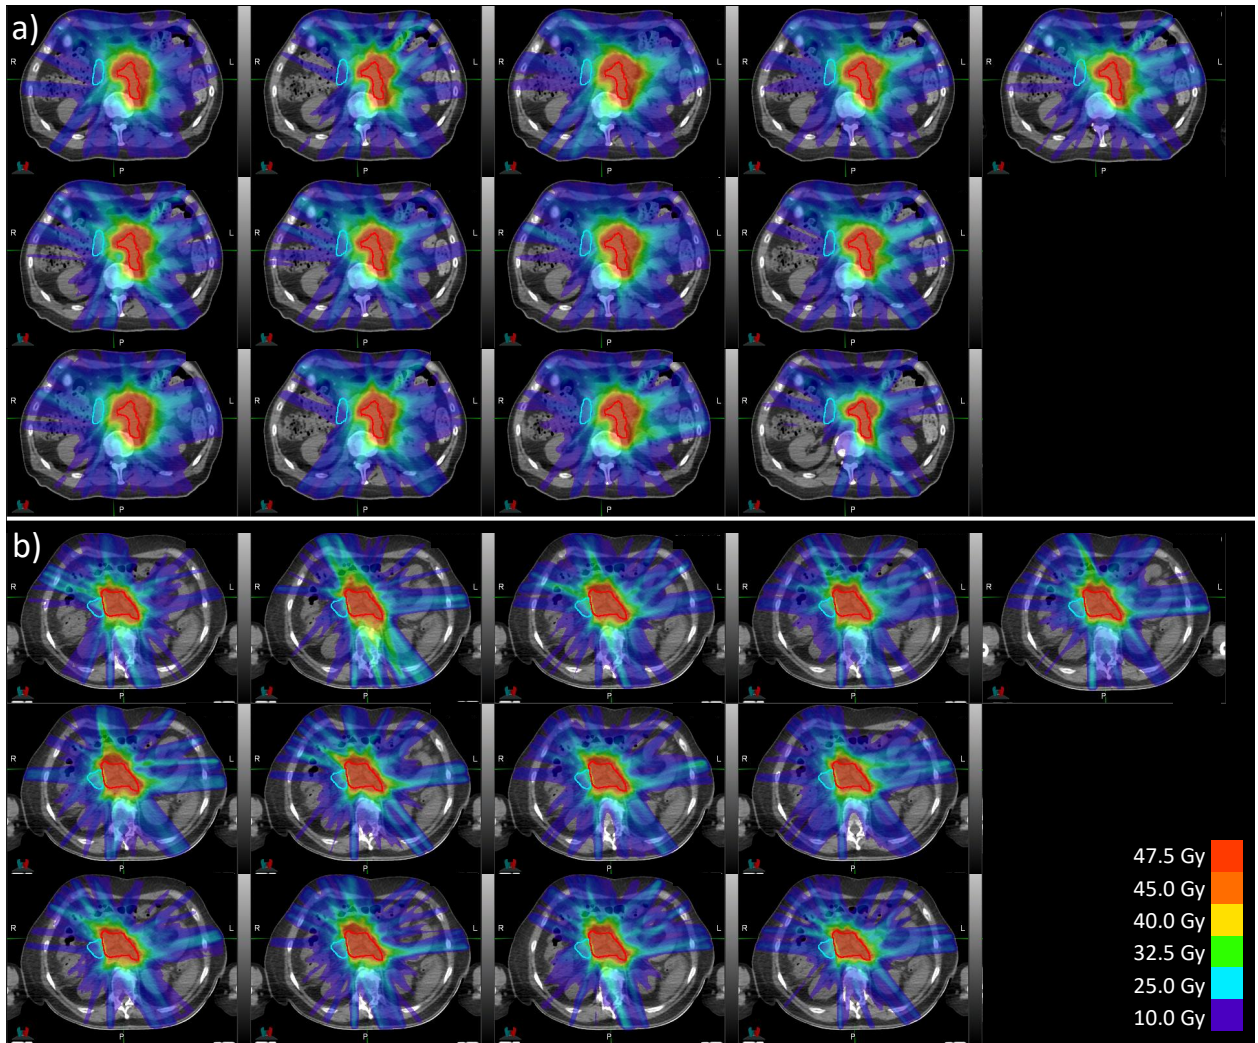

Figure S2: The dose distributions from all thirteen centers from phase III for a) case 1 and b) case 2. Red = GTV, cyan = duodenum.

Table S1: Results of Bartlett test of homogeneity of variances between the DVH parameters of phase III and phase I.  $p$ -values below 0.05 are considered statistically significant.

|                         | Case 1       |            | Case 2       |            |
|-------------------------|--------------|------------|--------------|------------|
|                         | $K$ -squared | $p$ -value | $K$ -squared | $p$ -value |
| GTV $D_{99\%}$          | 39.5         | < 0.001    | 40.2         | < 0.001    |
| GTV $D_{90\%}$          | 33.2         | < 0.001    | 23.9         | < 0.001    |
| GTV $D_{50\%}$          | 17.2         | < 0.001    | 9.0          | 0.011      |
| GTV $D_{1\%}$           | 10.2         | < 0.01     | 2.9          | 0.232      |
| Duodenum $D_{0.5cc}$    | 5.0          | 0.083      | 54.0         | < 0.001    |
| Small bowel $D_{0.5cc}$ | 0.3          | 0.845      | 26.5         | < 0.001    |
| Stomach $D_{0.5cc}$     | 3.5          | 0.174      | 19.7         | < 0.001    |

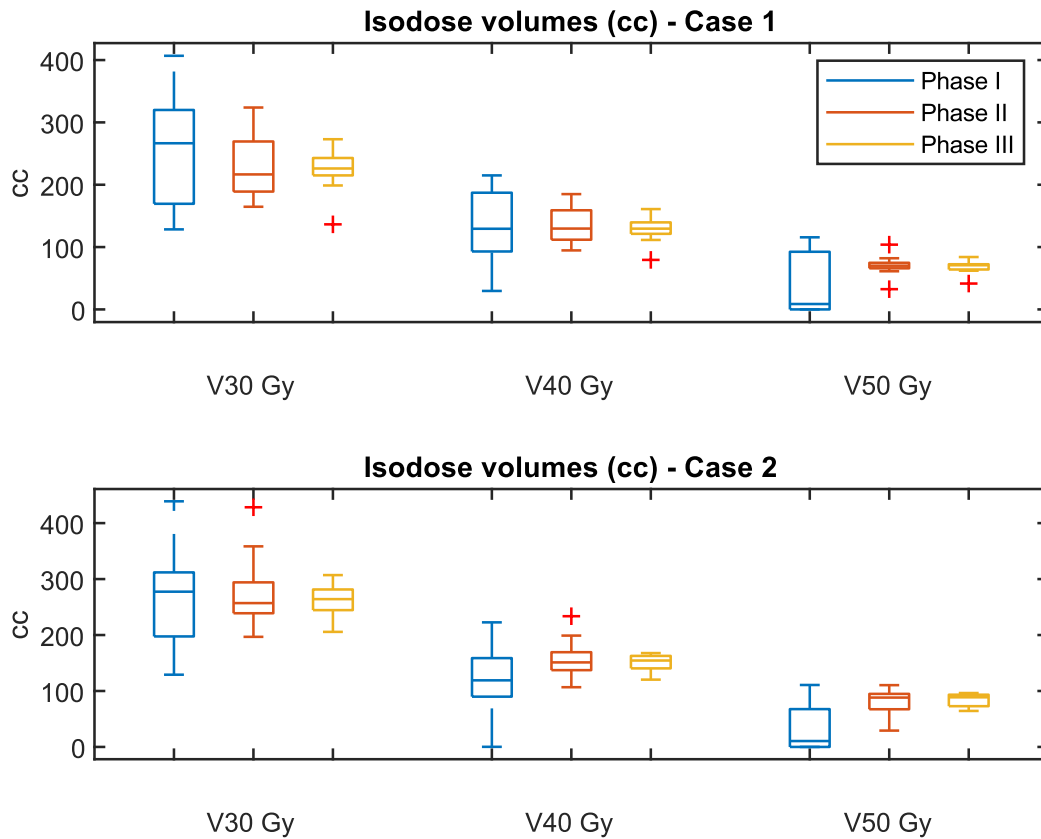

Figure S3: Boxplots of the volumes receiving at least 30 Gy, 40 Gy, or 50 Gy, in phases I-III. These were global isodose volumes, not confined to specific tissue. The whiskers of the boxplot extend to the minimum and maximum of the values not considered outliers (values further than 1.5 times the interquartile range from the box). The outliers are indicated by the red plus signs.

Table S2: Technical settings for the final treatment planning system (TPS) consensus template settings and parameters. The template is designed in Monaco (Elekta AB, Sweden) v5.51.10 (and has also been tested in v5.51.11), the TPS for the Unity MR-Linac. Please note that for some older versions of Monaco, care must be taken with the low number of segments as it might give errors during optimization due to a system bug. It is therefore strongly recommended to do rigorous offline testing when adopting the template.

| <b>Parameter</b>           | <b>Value</b>                         |
|----------------------------|--------------------------------------|
| Number of beams            | 14                                   |
| Number of segments         | 45                                   |
| Min. segment area          | 4.0 cm <sup>2</sup>                  |
| Min. segment width         | 0.5 cm                               |
| Min. MU per segment        | 5 MU                                 |
| Subtractive PTV-OAR margin | 5 mm                                 |
| GTV cost function          | Target equivalent uniform dose (EUD) |
| PTV cost function          | Target penalty                       |
| OARs cost function         | Serial ( $k = 20$ )                  |
| Body contour cost function | Quadratic overdose                   |
| Evaluated OARs             | Duodenum                             |
|                            | Small bowel                          |
|                            | Colon                                |
|                            | Stomach                              |
|                            | Spinal cord                          |
|                            | Aorta                                |
|                            | Celiac trunk                         |
|                            | Superior mesenteric artery           |
|                            | Biliary duct                         |
|                            | Left kidney                          |
|                            | Right kidney                         |
